# Supplementary material
Source: PubMed Central journal article supplement (PMC5435293)
Supplement: Supplemental_303.pdf [file Supplemental_303.pdf]

**Supplemental Table 1. Systemic physiological parameters**

| <i>Paradigm</i>       | <i>Species</i> | <i>Cistern</i> | <i>Group</i> | <i>Time</i> | <i>pH</i> | <i>pCO<sub>2</sub></i> | <i>pO<sub>2</sub></i> | <i>BP</i> |        |
|-----------------------|----------------|----------------|--------------|-------------|-----------|------------------------|-----------------------|-----------|--------|
| I. Spontaneous SD     | Mouse          | pc             | SAH          | 3h          | 7.36±0.05 | 40±4                   | 109±13                | 83±11     |        |
|                       |                |                |              | 12h         | 7.32±0.04 | 36±4                   | 120±17                | 76±6      |        |
|                       |                |                |              | 72h         | 7.34±0.02 | 43±2                   | 121±14                | 84±3      |        |
| II. SD susceptibility | Mouse          | pc             | Saline       | 12h         | 7.35±0.02 | 39±5                   | 134±18                | 98±6      |        |
|                       |                |                |              | SAH         | 12h       | 7.31±0.03              | 38±5                  | 129±15    | 95±10  |
|                       |                |                |              | 72h         | 7.37±0.01 | 36±4                   | 124±22                | 100±8     |        |
|                       |                | cm             | Saline       | 12h         | 7.32±0.02 | 40±2                   | 159±7                 | 76±1      |        |
|                       | SAH            |                |              | 12h         | 7.31±0.02 | 41±2                   | 164±15                | 74±2      |        |
|                       | Rat            | cm             | Saline       | 5d          | 7.46±0.04 | 38±5                   | 144±9                 | 96±4      |        |
| SAH                   |                |                |              | 5d          | 7.46±0.04 | 36±4                   | 133±18                | 101±11    |        |
| III. CBF during SD    | Mouse          | pc             | Saline       | 12h         | 7.36±0.03 | 34±4                   | 118±15                | 77±2      |        |
|                       |                |                |              | SAH         | 12h       | 7.34±0.03              | 32±3                  | 118±19    | 74±8   |
|                       |                |                |              | 72h         | 7.33±0.04 | 30±3                   | 131±10                | 72±4      |        |
|                       |                |                |              | 7d          | 7.37±0.02 | 28±4                   | 146±16                | 74±7      |        |
|                       | Rat            | cm             | Saline       | 5d          | 7.46±0.03 | 38±5                   | 144±9                 | 96±4      |        |
|                       |                |                |              | SAH         | 5d        | 7.46±0.04              | 36±4                  | 133±18    | 102±12 |
| IV. fMCAO             | Mouse          | pc             | Saline       | 12h         | 7.34±0.04 | 40±4                   | 99±13                 | 76±11     |        |
|                       |                |                |              | SAH         | 12h       | 7.34±0.05              | 38±7                  | 95±9      | 72±9   |
|                       |                |                |              | 72h         | 7.37±0.04 | 40±5                   | 97±14                 | 83±7      |        |
|                       |                |                |              | 7d          | 7.33±0.04 | 39±5                   | 92±7                  | 76±11     |        |
|                       |                | cm             | Saline       | 12h         | 7.32±0.02 | 41±4                   | 146±6                 | 73±3      |        |
|                       |                |                |              | SAH         | 12h       | 7.37±0.03              | 32±4                  | 152±5     | 74±4   |
| V. dMCAO              | Mouse          | pc             | Saline       | 12h         | 7.37±0.06 | 34±6                   | 158±43                | 74±6      |        |
|                       |                |                |              | SAH         | 12h       | 7.37±0.04              | 32±6                  | 181±40    | 76±7   |
|                       |                |                |              | 72h         | 7.37±0.03 | 35±5                   | 113±7                 | 79±6      |        |
|                       |                |                |              | 7d          | 7.35±0.02 | 34±2                   | 109±13                | 72±4      |        |
|                       |                | cm             | Saline       | 12h         | 7.36±0.05 | 33±4                   | 180±8                 | 65±6      |        |
|                       |                |                |              | SAH         | 12h       | 7.41±0.11              | 31±10                 | 182±5     | 74±7   |

**Supplemental Table 2. Electrophysiological properties of SD after SAH.**

| Cohort      | Group  | Time | SD Duration | SD Amplitude |
|-------------|--------|------|-------------|--------------|
| Mouse pcSAH | Naïve  | -    | 46±17       | 25±3         |
|             | Saline | 12h  | 45±9        | 25±2         |
|             | SAH    | 12h  | 49±13       | 24±3         |
|             | SAH    | 72h  | 56±10       | 26±5         |
| Mouse cmSAH | Saline | 12h  | 37±11       | 20±2         |
|             | SAH    | 12h  | 64±33       | 22±2         |
| Rat cmSAH   | Saline | 5d   | 24±5        | 24±2         |
|             | SAH    | 5d   | 28±8        | 22±4         |

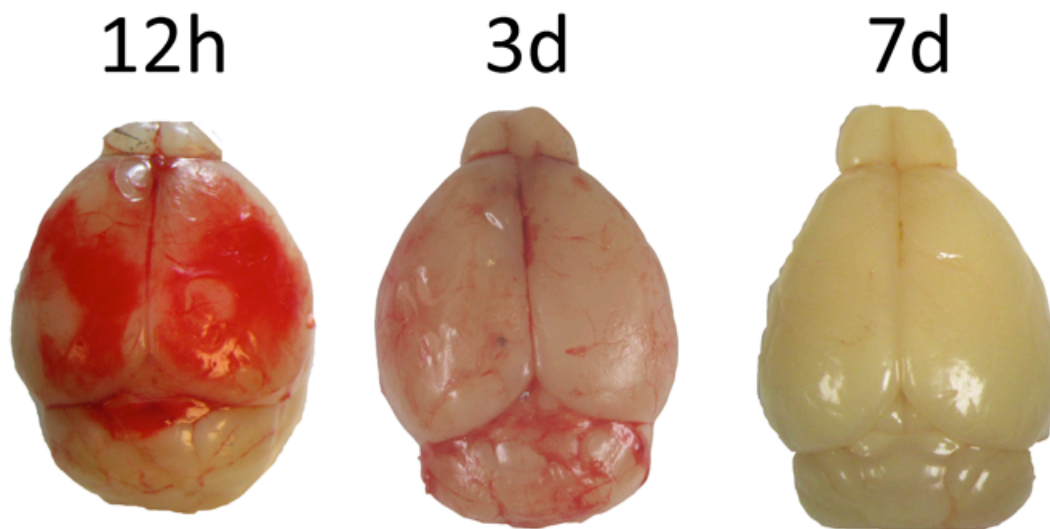

**Supplemental Figure 1. Gross examination of pcSAH.**

Representative views after pcSAH at different time points show blood clearance over time. Brains were removed after intracardiac perfusion to clear intravascular blood, and then freshly photographed for qualitative assessment. Mice were studied at 12 hours (n=9), 72 hours (n=14) and 7 days (n=7) after pcSAH.

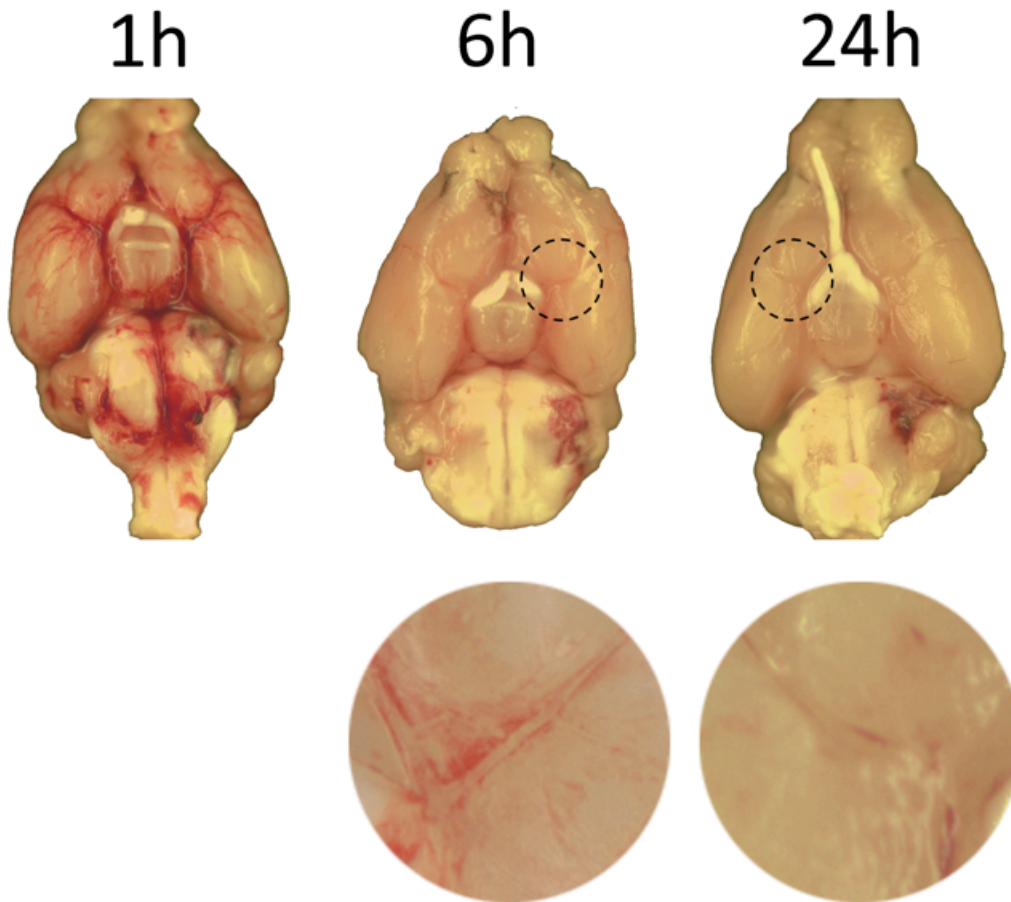

**Supplemental Figure 2. Gross examination of cmSAH.**

Representative views after cmSAH at different time points show blood clearance over time. Brains were removed after intracardiac perfusion to clear intravascular blood, and then freshly photographed for qualitative assessment. Insets show perivascular tracking of subarachnoid blood around the middle cerebral artery origin, and its clearance in cmSAH (dashed circles). Mice were studied at 1 (n=17), 6 (n=3) and 24 hours (n=3) after cmSAH.
